# Supplementary material for: A mixed community of skin microbiome representatives influences cutaneous processes more than individual members
Source: Microbiome. 2021 Jan 22;9:22. doi: 10.1186/s40168-020-00963-1 (PMC7825201; doi:10.1186/s40168-020-00963-1)
Supplement: Supplementary file 2 — Additional file 1. Microorganism Isolate Information. Table containing information for the bacterial microorganisms used in this study. Table containing the identifying genus, the isolate identifier used by the collecting study, the 16S rRNA sequence, and the least common ancestors of the bacterial isolate determined by classification to the Greengenes, RDP, and SILVA databases [42]. [file 40168_2020_963_MOESM2_ESM.xlsx]

## Sheet: Isolate Descriptions
Isolate Identificaiton	Isolate Name	Isolation Site	Trimmed 16S rRNA Sequence	Least Common Ancestor - greengenes	Least Common Ancestor - RDP	Least Common Ancestor - SILVA
Bacillus sp.	AF054_003	Forearm	tgtaagactgggataactccgggaaaccggagctaataccggatagttccttgaaccgcatggttcaaggatgaaagacggtttcggctgtcacttacagatggacccgcggcgcattagctagttggtggggtaatggctcaccaaggcgacgatgcgtagccgacctgagagggtgatcggccacactgggactgagacacggcccagactcctacgggaggcagcagtagggaatcttccgcaatggacgaaagtctgacggagcaacgccgcgtgagtgatgaaggttttcggatcgtaaagctctgttgttagggaagaacaagtgcgagagtaactgctcgcaccttgacggtacctaaccagaaagccacggctaactacgtgccagcagcc…	k__Bacteria;p__Firmicutes;c__Bacilli;o__Bacillales;f__Bacillaceae;g__Bacillus;	Bacteria;Firmicutes;Bacilli;Bacillales;Bacillaceae 1;Bacillus;	Bacteria;Firmicutes;Bacilli;Bacillales;Bacillaceae;Bacillus;
Micrococcus luteus	AF054_004	Antecubital Fossa	cttaactctgggataagcctgggaaactgggtctaataccggataggagcgtccaccgcatggtgggtgttggaaagatttatcggttttggatggactcgcggcctatcagcttgttggtgaggtaatggctcaccaaggcgacgacgggtagccggcctgagagggtgaccggccacactgggactgagacacggcccagactcctacgggaggcagcagtggggaatattgcacaatgggcgcaagcctgatgcagcgacgccgcgtgagggatgacggccttcgggttgtaaacctctttcagtagggaagaagcgaaagtgacggtacctgcagaagaagcaccggctaactacgtgccagcagccgcggtaatacgtagggtgcgagcgttat…	k__Bacteria;p__Actinobacteria;c__Actinobacteria;o__Actinomycetales;f__Micrococcaceae;g__Micrococcus;s__luteus;	Bacteria;"Actinobacteria";Actinobacteria;Actinobacteridae;Actinomycetales;Micrococcineae;Micrococcaceae;Micrococcus;	Bacteria;Actinobacteria;Actinobacteria;Micrococcales;Micrococcaceae;Micrococcus;
Roseomonas mucosa	AF061_002	Forearm	ctgaggtgggggacaaccccgggaaactggggctaataccgcatatgggctgaggcccaaagccgagaggcgcctttggagcggcctgcgtccgattaggtagttggtggggtaaaggcctaccaagcctgcgatcggtagctggtctgagaggacgaccagccacactgggactgagacacggcccagactcctacgggaggcagcagtggggaatattggacaatgggcgaaagcctgatccagcaatgccgcgtgggtgaagaaggtcttcggatcgtaaagccctttcgacggggacgatgatgacggtacccgtagaagaagccccggctaacttcgtgccagcagccgcggtaatacgaagggggctagcgttgctcggaattactgggcgta…	k__Bacteria;p__Proteobacteria;c__Alphaproteobacteria;o__Rhodospirillales;f__Acetobacteraceae;g__Roseomonas;s__mucosa;	Bacteria;"Proteobacteria";Alphaproteobacteria;Rhodospirillales;Acetobacteraceae;Roseomonas;	Bacteria;Proteobacteria;Alphaproteobacteria;Acetobacterales;Acetobacteraceae;Roseomonas;
Streptococcus luteciae	AF062_002	Antecubital Fossa	tactagcgggggataactattggaaacgatagctaataccgcataacagcatttaacccatgttagatgcttgaaagaagcaattgcttcactagtagatggacctgcgttgtattagctagttggtgaggtaacggctcaccaaggcgacgatacatagccgacctgagagggtgatcggccacactgggactgagacacggcccagactcctacgggaggcagcagtagggaatcttcggcaatgggggcaaccctgaccgagcaacgccgcgtgagtgaagaaggttttcggatcgtaaagctctgttgtaagagaagaacgtgtgtgagagtggaaagttcacacagtgacggtaacttaccagaaagggacggctaactacgtgccagcagccg…	k__Bacteria;p__Firmicutes;c__Bacilli;o__Lactobacillales;f__Streptococcaceae;g__Streptococcus;s__luteciae;	Bacteria;Firmicutes;Bacilli;Lactobacillales;Streptococcaceae;Streptococcus;	Bacteria;Firmicutes;Bacilli;Lactobacillales;Streptococcaceae;Streptococcus;
Acinetobacter lwoffi	AM066_105	Forehead	catgantgggggacaacatctcgaaagggatgctaataccgcatacgtcctacgggagaaagcaggggaccttcgggccttgcgctaatagatgagcctaagtcggattagctagttggtggggtaaaggcctaccaaggcgacgatctgtagcgggtctgagaggatgatccgccacactgggactgagacacggcccagactcctacgggaggcagcagtggggaatattggacaatggggggaaccctgatccagccatgccgcgtgtgtgaagaaggccttttggttgtaaagcactttaagcgaggaggaggctaccgagattaatactcttggatagtggacgttactcgcagaataagcaccggctaactctgtgccagcagccgcggtaat…	k__Bacteria;p__Proteobacteria;c__Gammaproteobacteria;o__Pseudomonadales;f__Moraxellaceae;g__Acinetobacter;s__lwoffii;	Bacteria;"Proteobacteria";Gammaproteobacteria;Pseudomonadales;Moraxellaceae;Acinetobacter;	Bacteria;Proteobacteria;Gammaproteobacteria;Pseudomonadales;Moraxellaceae;Acinetobacter;
Paenibacillus sp.	FM060_005	Antecubital Fossa	cacaagacagggataactaccggaaacggtagctaatacccgatacatccttttcctgcatgggagaaggaggaaaggcggagcaatctgtcacttgtggatgggcctgcggcgcattagctagttggtggggtaaaggcctaccaaggcgacgatgcgtagccgacctgagagggtgatcggccacactgggactgagacacggcccagactcctacgggaggcagcagtagggaatcttccgcaatgggcgaaagcctgacggagcaacgccgcgtgagtgatgaaggttttcggatcgtaaagctctgttgccagggaagaacgtctngnagagtaactgctactanagtgacggtacctgagaagaaagccccggctaactacgtgccagcagcc…	k__Bacteria;p__Firmicutes;c__Bacilli;o__Bacillales;f__Paenibacillaceae;g__Paenibacillus;	Bacteria;Firmicutes;Bacilli;Bacillales;Paenibacillaceae 1;Paenibacillus;	Bacteria;Firmicutes;Bacilli;Bacillales;Paenibacillaceae;Paenibacillus;
Staphylcoccus epidermidis	FM066_005	Forehead	tataagactgggataacttcgggaaaccggagctaataccggataatatattgaaccgcatggttcaatagtgaaagacggttttgctgtcacttatagatggatccgcgccgcattagctagttggtaaggtaacggcttaccaaggcaacgatgcgtagccgacctgagagggtgatcggccacactggaactgagacacggtccagactcctacgggaggcagcagtagggaatcttccgcaatgggcgaaagcctgacggagcaacgccgcgtgagtgatgaaggtcttcggatcgtaaaactctgttattagggaagaacaaatgtgtaagtaactatgcacgtcttgacggtacctaatcagaaagccacggctaactacgtgccagcagccg…	k__Bacteria;p__Firmicutes;c__Bacilli;o__Bacillales;f__Staphylococcaceae;g__Staphylococcus;s__epidermidis;	Bacteria;Firmicutes;Bacilli;Bacillales;Staphylococcaceae;Staphylococcus;	Bacteria;Firmicutes;Bacilli;Bacillales;Staphylococcaceae;Staphylococcus;
Corynebacterium sp.	AM066_013	Antecubital Fossa	CTACGGGAGGCAGCAGTGGGGAATATTGCACAATGGGCGCAAGCCTGATGCAGCGACGCCGCGTGGGGGATGACGGCCTTCGGGTTGTAAACTCCTTTCGTCAGGGACGAAGCGAAAGTGACGGTACCTGGATAAGAAGCACCGGCTAACTACGTGCCAGCAGCCGCGGTAATACGTAGGGTGCGAGCGTTGTCCGGAATTACTGGGCGTAAAGAGCTCGTAGGTGGTTTGTCGCGTCGTTTGTGTAAGTCCACGGCTTAACTGTGGGATGGCAGGCGATACGGGCATAACTTGAGTGCTGTAGGGGAGACTGGAATTCCTGGTGTAGCGGTGAAATGCGCAGATATCAGGAGGAACACCGATGGCGAAGGCAGGTCTCTGGGCAGTAACTGACGCTGA…	k__Bacteria;p__Actinobacteria;c__Actinobacteria;o__Actinomycetales;f__Corynebacteriaceae;g__Corynebacterium;	Bacteria;"Actinobacteria";Actinobacteria;Actinobacteridae;Actinomycetales;Corynebacterineae;Corynebacteriaceae;Corynebacterium;	Bacteria;Actinobacteria;Actinobacteria;Corynebacteriales;Corynebacteriaceae;Corynebacterium 1;
