# Supplementary material for: A mixed community of skin microbiome representatives influences cutaneous processes more than individual members
Source: Microbiome. 2021 Jan 22;9:22. doi: 10.1186/s40168-020-00963-1 (PMC7825201; doi:10.1186/s40168-020-00963-1)
Supplement: Supplementary file 4 — Additional file 3. Quality Assessment of RNA-Sequencing Data. This file shows quality control metrics for the sequences of each individual sample. This includes the number of reads in the sample, the number and percentage of those reads that were mapped to the transcriptome, the number and percentage of total transcripts covered, and the number and percentage of total genes hit. Additionally, we assessed Pearson correlations of each individual sample within a biological treatment group. [file 40168_2020_963_MOESM4_ESM.xlsx]

## Sheet: Quality Control
Type	Sample	# Reads in Sample	# Reads Mapped to Transcriptome	% Reads Mapped to Transcriptome	# Transcripts Covered by Sample's Reads	% Transcriptome Covered by Sample's Reads	# Genes Hit	% Genes Hit
Axenic	APL_16306	6788118	4196553	61.822	38644	69.5962	18026	68.0869
Axenic	APL_16307	6752893	4807546	71.1924	30328	54.6195	13906	52.525
Axenic	APL_16308	9917494	6150805	62.0198	38820	69.9132	18094	68.3437
Axenic	APL_16309	7114810	4427181	62.2249	38740	69.7691	18059	68.2115
Axenic	APL_16310	8465052	5219781	61.6627	38852	69.9708	18150	68.5552
Streptococcus78	APL_16311	6569044	4092759	62.3037	38031	68.4922	17781	67.1615
Streptococcus78	APL_16312	7166818	4382880	61.1552	38460	69.2648	17935	67.7432
Streptococcus78	APL_16313	6799488	4210843	61.9288	38717	69.7277	18084	68.3059
Streptococcus78	APL_16314	4973069	3092851	62.192	37654	67.8133	17526	66.1983
Streptococcus78	APL_16315	7397111	4490934	60.712	38498	69.3333	18052	68.1851
Roseomonas62	APL_16316	8301845	5343687	64.3675	38669	69.6412	18126	68.4646
Roseomonas62	APL_16317	9492291	5790197	60.9989	39763	71.6115	18669	70.5156
Roseomonas62	APL_16318	6726570	4265658	63.4151	38128	68.6669	17879	67.5316
Roseomonas62	APL_16319	7495012	4704325	62.7661	38006	68.4472	17825	67.3277
Roseomonas62	APL_16320	7801690	5057405	64.8245	38355	69.0757	17951	67.8036
Acinetobacter80	APL_16321	8081914	5020467	62.1198	38871	70.005	18221	68.8234
Acinetobacter80	APL_16322	2677963	1820199	67.9695	35795	64.4653	16585	62.644
Acinetobacter80	APL_16323	8569149	5090320	59.4029	39045	70.3184	18308	69.152
Acinetobacter80	APL_16324	6969422	4277840	61.3801	38069	68.5607	17818	67.3012
Acinetobacter80	APL_16325	7465467	4523478	60.592	38636	69.5818	18068	68.2455
Micrococcus42	APL_16326	2322554	1341878	57.776	35841	64.5481	16615	62.7573
Micrococcus42	APL_16327	8362041	5280535	63.1489	39018	70.2698	18298	69.1143
Micrococcus42	APL_16328	7009832	4207737	60.0262	38354	69.0739	17934	67.7394
Micrococcus42	APL_16329	10888306	6842460	62.8423	39744	71.5773	18688	70.5873
Micrococcus42	APL_16330	7261971	4350316	59.9054	39110	70.4355	18237	68.8839
Paenibacillus49	APL_16331	9200870	5481442	59.5753	39150	70.5075	18442	69.6582
Paenibacillus49	APL_16332	9992670	5926806	59.3115	39511	71.1577	18468	69.7564
Paenibacillus49	APL_16333	7351130	4481780	60.9672	38774	69.8303	18159	68.5892
Paenibacillus49	APL_16334	8353139	4963293	59.4183	38345	69.0577	17959	67.8338
Paenibacillus49	APL_16335	7481173	4417324	59.0459	39133	70.4769	18286	69.0689
Corynebactium19	APL_16336	8810161	5271005	59.8287	39357	70.8803	18375	69.4051
Corynebactium19	APL_16337	7549036	4479906	59.3441	39280	70.7416	18391	69.4655
Corynebactium19	APL_16338	7467729	4409302	59.0448	39330	70.8317	18399	69.4958
Corynebactium19	APL_16339	10925583	6509727	59.5824	39165	70.5345	18344	69.288
Corynebactium19	APL_16340	6799168	4052710	59.606	38322	69.0163	17928	67.7167
Bacillus13	APL_16341	9395819	5725596	60.9377	38290	68.9587	17935	67.7432
Bacillus13	APL_16342	10381690	6458568	62.2111	38752	69.7907	18141	68.5212
Bacillus13	APL_16343	8721088	5416671	62.11	38881	70.0231	18166	68.6157
Bacillus13	APL_16344	10053334	6091692	60.5937	39757	71.6007	18585	70.1983
Bacillus13	APL_16345	3486149	2080307	59.6735	37831	68.132	17567	66.3532
Mixture	APL_16346	6184730	3819728	61.7606	37939	68.3265	17707	66.882
Mixture	APL_16347	9548376	5976429	62.5911	38515	69.3639	18011	68.0302
Mixture	APL_16348	9904047	5912201	59.6948	39429	71.01	18498	69.8697
Mixture	APL_16349	5668763	3441136	60.7035	38404	69.164	17889	67.5694
Mixture	APL_16350	62544	36878	58.9633	18069	32.5415	8343	31.5127
Staphylococcus88	APL_16351	359164	213933	59.5642	29721	53.5263	13669	51.6298
Staphylococcus88	APL_16352	5862469	3559011	60.7084	38389	69.137	17923	67.6978
Staphylococcus88	APL_16353	9467933	5658056	59.7602	39798	71.6745	18675	70.5382
Staphylococcus88	APL_16354	3786531	2299921	60.7395	37755	67.9952	17546	66.2738
Staphylococcus88	APL_16355	9094404	5586738	61.4305	39443	71.0352	18422	69.5826
All	Avg	7.34555e+06	4.50518e+06	61.3183	37869.8	68.2019	17693.3	66.8301

## Sheet: Pearson Correlations
							Individual sample was omitted from transcriptomic analysis due to poor correlation with other samples in the biological group
Axenic	TPM_06	TPM_07	TPM_08	TPM_09	TPM_10
TPM_06	1	0.912907	0.973401	0.994479	0.96849
TPM_07	0.912907	1	0.867186	0.888219	0.835037
TPM_08	0.973401	0.867186	1	0.974716	0.959372
TPM_09	0.994479	0.888219	0.974716	1	0.970446
TPM_10	0.96849	0.835037	0.959372	0.970446	1
Acinetobacter	TPM_21	TPM_22	TPM_23	TPM_24	TPM_25
TPM_21	1	0.965966	0.978515	0.975519	0.940374
TPM_22	0.965966	1	0.917835	0.92138	0.859758
TPM_23	0.978515	0.917835	1	0.994244	0.986602
TPM_24	0.975519	0.92138	0.994244	1	0.986838
TPM_25	0.940374	0.859758	0.986602	0.986838	1
Bacillus	TPM_41	TPM_42	TPM_43	TPM_44	TPM_45
TPM_41	1	0.921086	0.928107	0.922372	0.976102
TPM_42	0.921086	1	0.985775	0.960087	0.920743
TPM_43	0.928107	0.985775	1	0.9738	0.944433
TPM_44	0.922372	0.960087	0.9738	1	0.946686
TPM_45	0.976102	0.920743	0.944433	0.946686	1
Corynebactium	TPM_36	TPM_37	TPM_38	TPM_39	TPM_40
TPM_36	1	0.983741	0.975571	0.981352	0.98012
TPM_37	0.983741	1	0.973467	0.963102	0.966092
TPM_38	0.975571	0.973467	1	0.952711	0.949058
TPM_39	0.981352	0.963102	0.952711	1	0.995902
TPM_40	0.98012	0.966092	0.949058	0.995902	1
Micrococcus	TPM_26	TPM_27	TPM_28	TPM_29	TPM_30
TPM_26	1	0.954533	0.965978	0.989591	0.948561
TPM_27	0.954533	1	0.974613	0.971813	0.953436
TPM_28	0.965978	0.974613	1	0.981212	0.96038
TPM_29	0.989591	0.971813	0.981212	1	0.958934
TPM_30	0.948561	0.953436	0.96038	0.958934	1
Paenibacillus	TPM_31	TPM_32	TPM_33	TPM_34	TPM_35
TPM_31	1	0.940104	0.954208	0.967414	0.916411
TPM_32	0.940104	1	0.943178	0.95205	0.957103
TPM_33	0.954208	0.943178	1	0.962408	0.875474
TPM_34	0.967414	0.95205	0.962408	1	0.902267
TPM_35	0.916411	0.957103	0.875474	0.902267	1
Roseomonas	TPM_16	TPM_17	TPM_18	TPM_19	TPM_20
TPM_16	1	0.959079	0.972726	0.990649	0.982569
TPM_17	0.959079	1	0.984108	0.980253	0.977319
TPM_18	0.972726	0.984108	1	0.985	0.990062
TPM_19	0.990649	0.980253	0.985	1	0.989964
TPM_20	0.982569	0.977319	0.990062	0.989964	1
Staphylococcus	TPM_51	TPM_52	TPM_53	TPM_54	TPM_55
TPM_51	1	0.956623	0.962614	0.974068	0.95008
TPM_52	0.956623	1	0.953086	0.983299	0.980267
TPM_53	0.962614	0.953086	1	0.954075	0.955564
TPM_54	0.974068	0.983299	0.954075	1	0.982909
TPM_55	0.95008	0.980267	0.955564	0.982909	1
Streptococcus	TPM_11	TPM_12	TPM_13	TPM_14	TPM_15
TPM_11	1	0.937843	0.953333	0.971275	0.981672
TPM_12	0.937843	1	0.98907	0.953932	0.968041
TPM_13	0.953333	0.98907	1	0.966625	0.971994
TPM_14	0.971275	0.953932	0.966625	1	0.98426
TPM_15	0.981672	0.968041	0.971994	0.98426	1
Mixture	TPM_46	TPM_47	TPM_48	TPM_49	TPM_50
TPM_46	1	0.994179	0.955845	0.987655	0.845204
TPM_47	0.994179	1	0.945763	0.983875	0.833634
TPM_48	0.955845	0.945763	1	0.979867	0.92955
TPM_49	0.987655	0.983875	0.979867	1	0.895962
TPM_50	0.845204	0.833634	0.92955	0.895962	1
