# Supplementary material for: A mixed community of skin microbiome representatives influences cutaneous processes more than individual members
Source: Microbiome. 2021 Jan 22;9:22. doi: 10.1186/s40168-020-00963-1 (PMC7825201; doi:10.1186/s40168-020-00963-1)
Supplement: Supplementary file 6 — Additional file 5. Gene Set Overrepresentation Test Data. This file contains input and output information important to the Gene Set Overrepresentation Test. Genes used for the background gene list. The output data from the PANTHER Overrepresentation tests is also shown. (PDF 1358 kb) [file 40168_2020_963_MOESM6_ESM.xlsx]

## Sheet: Background Gene List
A1BG
A1BG-AS1
A1CF
A2M
A2M-AS1
A2ML1
A4GALT
AAAS
AACS
AACSP1
AADAC
AADACL2
AADACL2-AS1
AADAT
AAED1
AAGAB
AAK1
AAMDC
AAMP
AANAT
AAR2
AARD
AARS
AARS2
AARSD1
AASDH
AASDHPPT
AASS
AATBC
AATF
AATK
ABALON
ABAT
ABCA1
ABCA10
ABCA11P
ABCA12
ABCA13
ABCA2
ABCA4
ABCA5
ABCA6
ABCA7
ABCA8
ABCA9
ABCB10
ABCB11
ABCB4
ABCB5
ABCB6
ABCB7
ABCB8
ABCB9
ABCC1
ABCC10
ABCC13
ABCC2
ABCC3
ABCC4
ABCC5
ABCC6
ABCC9
ABCD1
ABCD3
ABCD4
ABCE1
ABCF1
ABCF2
ABCF3
ABCG1
ABCG2
ABCG4
ABHD1
ABHD10
ABHD11
ABHD12
ABHD12B
ABHD13
ABHD14A
ABHD14A-ACY1
ABHD14B
ABHD15
ABHD16A
ABHD16B
ABHD17A
ABHD17B
ABHD17C
ABHD2
ABHD3
ABHD4
ABHD5
ABHD6
ABHD8
ABI1
ABI2
ABI3BP
ABL1
ABL2
ABLIM1
ABLIM2
ABLIM3
ABO
ABR
ABRA
ABRACL
ABT1
ABTB1
ABTB2
ACAA1
ACAA2
ACACA
ACACB
ACAD10
ACAD11
ACAD8
ACAD9
ACADM
ACADS
ACADSB
ACADVL
ACAP1
ACAP2
ACAP3
ACAT1
ACAT2
ACBD3
ACBD4
ACBD5
ACBD6
ACBD7
ACCS
ACD
ACE
ACE2
ACER2
ACER3
ACIN1
ACKR2
ACKR3
ACKR4
ACLY
ACO1
ACO2
ACOT11
ACOT13
ACOT2
ACOT7
ACOT8
ACOT9
ACOX1
ACOX2
ACOX3
ACP1
ACP2
ACP5
ACP6
ACPP
ACRC
ACRV1
ACSBG1
ACSF2
ACSF3
ACSL1
ACSL3
ACSL4
ACSL5
ACSL6
ACSM3
ACSS1
ACSS2
ACSS3
ACTA2
ACTA2-AS1
ACTB
ACTG1
ACTG1P17
ACTG1P20
ACTL10
ACTL6A
ACTN1
ACTN4
ACTR10
ACTR1A
ACTR1B
ACTR2
ACTR3
ACTR3B
ACTR3C
ACTR5
ACTR6
ACTR8
ACTRT3
ACVR1
ACVR1B
ACVR1C
ACVR2A
ACVR2B
ACVR2B-AS1
ACVRL1
ACY1
ACYP1
ACYP2
ADA
ADAL
ADAM10
ADAM11
ADAM12
ADAM15
ADAM17
ADAM19
ADAM1A
ADAM20
ADAM20P1
ADAM21
ADAM22
ADAM23
ADAM28
ADAM32
ADAM33
ADAM8
ADAM9
ADAMDEC1
ADAMTS1
ADAMTS10
ADAMTS12
ADAMTS13
ADAMTS14
ADAMTS15
ADAMTS16
ADAMTS17
ADAMTS2
ADAMTS3
ADAMTS4
ADAMTS5
ADAMTS6
ADAMTS7
ADAMTS8
ADAMTS9
ADAMTS9-AS2
ADAMTSL2
ADAMTSL4
ADAMTSL4-AS1
ADAMTSL5
ADAP1
ADAP2
ADAR
ADARB1
ADARB2
ADAT1
ADAT2
ADAT3
ADCK1
ADCK2
ADCK3
ADCK4
ADCK5
ADCY1
ADCY10P1
ADCY2
ADCY3
ADCY4
ADCY5
ADCY6
ADCY7
ADCY9
ADCYAP1R1
ADD1
ADD3
ADGRA2
ADGRA3
ADGRB2
ADGRD1
ADGRE2
ADGRE5
ADGRF1
ADGRF2
ADGRF4
ADGRF5
ADGRG1
ADGRG2
ADGRG4
ADGRG6
ADGRL1
ADGRL2
ADGRL3
ADGRL4
ADH1B
ADH4
ADH5
ADH6
ADH7
ADHFE1
ADI1
ADIPOQ
ADIPOQ-AS1
ADIPOR1
ADIPOR2
ADIRF
ADK
ADM
ADM2
ADM5
ADNP
ADNP2
ADNP-AS1
ADO
ADORA1
ADORA2A
ADORA2A-AS1
ADORA2B
ADPGK
ADPGK-AS1
ADPRH
ADPRHL1
ADPRHL2
ADPRM
ADRA1A
ADRA2C
ADRB2
ADRBK1
ADRBK2
ADRM1
ADSL
ADSS
ADSSL1
ADTRP
AEBP1
AEBP2
AEN
AES
AFAP1
AFAP1-AS1
AFAP1L1
AFAP1L2
AFF1
AFF2
AFF3
AFF4
AFG3L1P
AFG3L2
AFMID
AFP
AFTPH
AGA
AGAP1
AGAP11
AGAP2
AGAP2-AS1
AGAP3
AGAP4
AGAP5
AGAP6
AGAP7P
AGAP9
AGBL2
AGBL4
AGBL5
AGER
AGFG1
AGFG2
AGGF1
AGK
AGL
AGMAT
AGMO
AGO1
AGO2
AGO3
AGO4
AGPAT1
AGPAT2
AGPAT3
AGPAT4
AGPAT4-IT1
AGPAT5
AGPS
AGR2
AGRN
AGT
AGTPBP1
AGTRAP
AHCTF1
AHCTF1P1
AHCY
AHCYL1
AHCYL2
AHDC1
AHI1
AHNAK
AHNAK2
AHR
AHRR
AHSA1
AHSA2
AICDA
AIDA
AIF1L
AIFM1
AIFM2
AIG1
AIM1
AIM1L
AIMP1
AIMP2
AIP
AIPL1
AIRE
AIRN
AJAP1
AJUBA
AK1
AK2
AK3
AK4
AK5
AK6
AK7
AK9
AKAP1
AKAP10
AKAP11
AKAP12
AKAP13
AKAP14
AKAP17A
AKAP2
AKAP3
AKAP5
AKAP6
AKAP7
AKAP8
AKAP8L
AKAP9
AKIP1
AKIRIN1
AKIRIN2
AKNA
AKNAD1
AKR1A1
AKR1B1
AKR1B10
AKR1B15
AKR1C1
AKR1C2
AKR1C3
AKR1C6P
AKR1D1
AKR7A2
AKR7A2P1
AKR7A3
AKR7L
AKT1
AKT1S1
AKT2
AKT3
AKTIP
ALAD
ALAS1
ALCAM
ALDH16A1
ALDH18A1
ALDH1A1
ALDH1A2
ALDH1A3
ALDH1B1
ALDH1L1
ALDH1L2
ALDH2
ALDH3A1
ALDH3A2
ALDH3B1
ALDH3B2
ALDH4A1
ALDH5A1
ALDH6A1
ALDH7A1
ALDH8A1
ALDH9A1
ALDOA
ALDOC
ALG1
ALG10
ALG10B
ALG11
ALG12
ALG13
ALG14
ALG1L9P
ALG2
ALG3
ALG5
ALG6
ALG8
ALG9
ALK
ALKBH1
ALKBH2
ALKBH3
ALKBH3-AS1
ALKBH4
ALKBH5
ALKBH6
ALKBH7
ALKBH8
ALMS1
ALMS1-IT1
ALMS1P
ALOX12
ALOX12-AS1
ALOX12B
ALOX12P2
ALOX15
ALOX15B
ALOXE3
ALPK1
ALPK2
ALPK3
ALPP
ALS2
ALS2CL
ALS2CR11
ALS2CR12
ALYREF
AMACR
AMBRA1
AMD1
AMDHD1
AMDHD2
AMER1
AMER2
AMER3
AMFR
AMIGO1
AMIGO2
AMIGO3
AMMECR1
AMMECR1L
AMN
AMN1
AMOT
AMOTL1
AMOTL2
AMPD2
AMPD3
AMPH
AMT
AMY2B
AMZ1
AMZ2
AMZ2P1
ANAPC1
ANAPC10
ANAPC11
ANAPC13
ANAPC15
ANAPC16
ANAPC1P1
ANAPC2
ANAPC4
ANAPC5
ANAPC7
ANG
ANGEL1
ANGEL2
ANGPT1
ANGPT2
ANGPTL1
ANGPTL2
ANGPTL4
ANK1
ANK2
ANK3
ANKAR
ANKDD1A
ANKDD1B
ANKEF1
ANKFN1
ANKFY1
ANKH
ANKHD1
ANKHD1-EIF4EBP3
ANKIB1
ANKK1
ANKLE1
ANKLE2
ANKMY1
ANKMY2
ANKRA2
ANKRD1
ANKRD10
ANKRD11
ANKRD12
ANKRD13A
ANKRD13B
ANKRD13C
ANKRD13D
ANKRD16
ANKRD17
ANKRD18A
ANKRD18B
ANKRD19P
ANKRD2
ANKRD20A1
ANKRD20A12P
ANKRD20A19P
ANKRD20A2
ANKRD20A3
ANKRD20A4
ANKRD20A5P
ANKRD20A8P
ANKRD20A9P
ANKRD22
ANKRD23
ANKRD26
ANKRD27
ANKRD28
ANKRD29
ANKRD30A
ANKRD30B
ANKRD30BP2
ANKRD30BP3
ANKRD31
ANKRD33B
ANKRD34A
ANKRD35
ANKRD36
ANKRD36B
ANKRD36BP1
ANKRD36BP2
ANKRD36C
ANKRD37
ANKRD39
ANKRD40
ANKRD42
ANKRD44
ANKRD44-IT1
ANKRD45
ANKRD46
ANKRD49
ANKRD50
ANKRD52
ANKRD54
ANKRD6
ANKRD60
ANKRD62
ANKRD62P1-PARP4P3
ANKRD65
ANKRD9
ANKS1A
ANKS1B
ANKS3
ANKS4B
ANKS6
ANKZF1
ANLN
ANO1
ANO10
ANO3
ANO4
ANO5
ANO6
ANO7
ANO8
ANO9
ANOS1
ANP32A
ANP32A-IT1
ANP32B
ANP32E
ANPEP
ANTXR1
ANTXR2
ANXA1
ANXA11
ANXA2
ANXA2P2
ANXA2P3
ANXA2R
ANXA3
ANXA4
ANXA5
ANXA6
ANXA7
ANXA8
ANXA8L1
ANXA9
AOC2
AOC4P
AOX1
AOX2P
AP1AR
AP1B1
AP1G1
AP1G2
AP1M1
AP1M2
AP1S1
AP1S2
AP1S3
AP2A1
AP2A2
AP2B1
AP2M1
AP2S1
AP3B1
AP3D1
AP3M1
AP3M2
AP3S1
AP3S2
AP4B1
AP4B1-AS1
AP4E1
AP4M1
AP4S1
AP5B1
AP5M1
AP5S1
AP5Z1
APAF1
APBA1
APBA2
APBA3
APBB1
APBB1IP
APBB2
APBB3
APC
APCDD1
APCDD1L
APCDD1L-AS1
APEH
APELA
APEX1
APEX2
APH1A
APH1B
API5
APIP
APITD1
APITD1-CORT
APLF
APLN
APLP2
APMAP
APOA1-AS
APOA1BP
APOB
APOBEC2
APOBEC3A
APOBEC3B-AS1
APOBEC3C
APOBEC3D
APOBEC3F
APOBEC3G
APOBEC4
APOBR
APOC1
APOC1P1
APOC4
APOD
APOE
APOF
APOL1
APOL2
APOL3
APOL4
APOL5
APOL6
APOLD1
APOM
APOO
APOOL
APOPT1
APP
APPBP2
APPL1
APPL2
APRT
APTR
APTX
AQP1
AQP11
AQP3
AQP4-AS1
AQP5
AQP6
AQP7P1
AQP7P3
AQP9
AQR
AR
ARAF
ARAP1
ARAP2
ARAP3
ARCN1
AREG
AREL1
ARF1
ARF3
ARF4
ARF5
ARF6
ARFGAP1
ARFGAP2
ARFGAP3
ARFGEF1
ARFGEF2
ARFGEF3
ARFIP1
ARFIP2
ARFRP1
ARG1
ARG2
ARGFX
ARGFXP2
ARGLU1
ARHGAP1
ARHGAP10
ARHGAP11A
ARHGAP11B
ARHGAP12
ARHGAP17
ARHGAP18
ARHGAP19
ARHGAP19-SLIT1
ARHGAP21
ARHGAP22
ARHGAP23
ARHGAP24
ARHGAP25
ARHGAP26
ARHGAP26-AS1
ARHGAP27
ARHGAP28
ARHGAP29
ARHGAP30
ARHGAP31
ARHGAP32
ARHGAP33
ARHGAP35
ARHGAP39
ARHGAP4
ARHGAP40
ARHGAP42
ARHGAP44
ARHGAP5
ARHGAP5-AS1
ARHGAP6
ARHGAP8
ARHGDIA
ARHGDIB
ARHGEF1
ARHGEF10
ARHGEF10L
ARHGEF11
ARHGEF12
ARHGEF16
ARHGEF17
ARHGEF18
ARHGEF19
ARHGEF2
ARHGEF25
ARHGEF26
ARHGEF26-AS1
ARHGEF28
ARHGEF3
ARHGEF33
ARHGEF34P
ARHGEF35
ARHGEF37
ARHGEF38
ARHGEF39
ARHGEF4
ARHGEF40
ARHGEF5
ARHGEF6
ARHGEF7
ARHGEF9
ARID1A
ARID1B
ARID2
ARID3A
ARID3B
ARID4A
ARID4B
ARID5A
ARID5B
ARIH1
ARIH2
ARIH2OS
ARL1
ARL10
ARL11
ARL13A
ARL13B
ARL14
ARL14EP
ARL15
ARL16
ARL17A
ARL2
ARL2BP
ARL2-SNX15
ARL3
ARL4A
ARL4C
ARL4D
ARL5A
ARL5B
ARL6
ARL6IP1
ARL6IP4
ARL6IP5
ARL6IP6
ARL8A
ARL8B
ARMC1
ARMC10
ARMC12
ARMC2
ARMC2-AS1
ARMC4
ARMC5
ARMC6
ARMC7
ARMC8
ARMC9
ARMCX1
ARMCX2
ARMCX3
ARMCX4
ARMCX5
ARMCX5-GPRASP2
ARMCX6
ARMT1
ARNT
ARNT2
ARNTL
ARNTL2
ARNTL2-AS1
ARPC1A
ARPC1B
ARPC2
ARPC3
ARPC4
ARPC4-TTLL3
ARPC5
ARPC5L
ARPIN
ARPP19
ARR3
ARRB1
ARRB2
ARRDC1
ARRDC1-AS1
ARRDC2
ARRDC3
ARRDC3-AS1
ARRDC4
ARRDC5
ARSA
ARSB
ARSD
ARSE
ARSF
ARSG
ARSI
ARSJ
ARSK
ART5
ARTN
ARV1
ARVCF
ARX
AS3MT
ASAH1
ASAH2B
ASAP1
ASAP1-IT1
ASAP1-IT2
ASAP2
ASAP3
ASB1
ASB11
ASB13
ASB14
ASB16
ASB16-AS1
ASB3
ASB4
ASB5
ASB6
ASB7
ASB8
ASCC1
ASCC2
ASCC3
ASCL2
ASF1A
ASF1B
ASGR1
ASGR2
ASH1L
ASH1L-AS1
ASH2L
ASIC1
ASIC3
ASL
ASMTL
ASMTL-AS1
ASNA1
ASNS
ASNSD1
ASPG
ASPH
ASPHD1
ASPHD2
ASPM
ASPN
ASPRV1
ASPSCR1
ASRGL1
ASS1
ASTE1
ASTN2
ASUN
ASXL1
ASXL2
ASXL3
ATAD1
ATAD2
ATAD2B
ATAD3A
ATAD3B
ATAD3C
ATAD5
ATAT1
ATCAY
ATE1
ATE1-AS1
ATF1
ATF2
ATF3
ATF4
ATF5
ATF6
ATF6B
ATF7
ATF7IP
ATF7IP2
ATG10
ATG101
ATG12
ATG13
ATG14
ATG16L1
ATG16L2
ATG2A
ATG2B
ATG3
ATG4A
ATG4B
ATG4C
ATG4D
ATG5
ATG7
ATG9A
ATG9B
ATHL1
ATIC
ATL1
ATL2
ATL3
ATM
ATMIN
ATN1
ATOH8
ATOX1
ATP10B
ATP10D
ATP11A
ATP11A-AS1
ATP11B
ATP11C
ATP12A
ATP13A1
ATP13A2
ATP13A3
ATP13A4
ATP13A4-AS1
ATP1A1
ATP1A1-AS1
ATP1A2
ATP1B1
ATP1B2
ATP1B3
ATP1B4
ATP2A1
ATP2A1-AS1
ATP2A2
ATP2A3
ATP2B1
ATP2B4
ATP2C1
ATP2C2
ATP5A1
ATP5B
ATP5C1
ATP5D
ATP5E
ATP5EP2
ATP5F1
ATP5G1
ATP5G2
ATP5G3
ATP5H
ATP5I
ATP5J
ATP5J2
ATP5J2-PTCD1
ATP5L
ATP5L2
ATP5O
ATP5S
ATP5SL
ATP6AP1
ATP6AP1L
ATP6AP2
ATP6V0A1
ATP6V0A2
ATP6V0B
ATP6V0C
ATP6V0D1
ATP6V0D2
ATP6V0E1
ATP6V0E2
ATP6V1A
ATP6V1B1-AS1
ATP6V1B2
ATP6V1C1
ATP6V1C2
ATP6V1D
ATP6V1E1
ATP6V1E2
ATP6V1F
ATP6V1G1
ATP6V1G2-DDX39B
ATP6V1H
ATP7A
ATP7B
ATP8A1
ATP8B1
ATP8B2
ATP8B4
ATP8B5P
ATP9A
ATP9B
ATPAF1
ATPAF2
ATPIF1
ATR
ATRAID
ATRIP
ATRN
ATRX
ATXN1
ATXN10
ATXN1L
ATXN2
ATXN2L
ATXN3
ATXN7
ATXN7L1
ATXN7L2
ATXN7L3
ATXN7L3B
AUH
AUNIP
AUP1
AURKA
AURKAIP1
AURKAPS1
AURKB
AURKC
AUTS2
AVEN
AVIL
AVL9
AVPI1
AVPR1A
AXIN1
AXIN2
AXL
AZGP1
AZGP1P1
AZI2
AZIN1
AZIN2
B2M
B3GALNT1
B3GALNT2
B3GALT2
B3GALT4
B3GALT5-AS1
B3GALT6
B3GAT3
B3GLCT
B3GNT2
B3GNT3
B3GNT4
B3GNT5
B3GNT6
B3GNT7
B3GNT8
B3GNT9
B3GNTL1
B4GALNT1
B4GALNT3
B4GALNT4
B4GALT1
B4GALT1-AS1
B4GALT2
B4GALT3
B4GALT4
B4GALT5
B4GALT6
B4GALT7
B4GAT1
B9D1
B9D2
BAALC
BAALC-AS1
BAALC-AS2
BAAT
BABAM1
BACE1
BACE1-AS
BACE2
BACH1
BACH1-IT2
BACH2
BAD
BAG1
BAG2
BAG3
BAG4
BAG5
BAG6
BAGE
BAHCC1
BAHD1
BAIAP2
BAIAP2-AS1
BAIAP2L1
BAIAP2L2
BAIAP3
BAK1
BAMBI
BANF1
BANK1
BANP
BAP1
BARD1
BARX2
BASP1
BATF2
BATF3
BAX
BAZ1A
BAZ1B
BAZ2A
BAZ2B
BBC3
BBIP1
BBOX1
BBOX1-AS1
BBS1
BBS10
BBS12
BBS2
BBS4
BBS5
BBS7
BBS9
BBX
BCAM
BCAP29
BCAP31
BCAR1
BCAR3
BCAR4
BCAS1
BCAS2
BCAS3
BCAS4
BCAT1
BCAT2
BCCIP
BCDIN3D
BCDIN3D-AS1
BCHE
BCKDHA
BCKDHB
BCKDK
BCL10
BCL11A
BCL11B
BCL2
BCL2A1
BCL2L1
BCL2L10
BCL2L11
BCL2L12
BCL2L13
BCL2L15
BCL2L2
BCL2L2-PABPN1
BCL3
BCL6
BCL7A
BCL7B
BCL7C
BCL9
BCL9L
BCLAF1
BCO1
BCO2
BCOR
BCORL1
BCORP1
BCR
BCRP3
BCS1L
BCYRN1
BDH1
BDH2
BDKRB1
BDKRB2
BDNF
BDNF-AS
BDP1
BECN1
BEND2
BEND3
BEND3P3
BEND5
BEND6
BEND7
BEST1
BEST2
BEST3
BET1
BET1L
BEX2
BEX4
BFAR
BFSP1
BGLAP
BGN
BHLHB9
BHLHE22
BHLHE40
BHLHE40-AS1
BHLHE41
BHMT2
BICC1
BICD1
BICD2
BID
BIK
BIN1
BIN3
BIN3-IT1
BIRC2
BIRC3
BIRC5
BIRC6
BIRC6-AS2
BISPR
BIVM
BIVM-ERCC5
BLACAT1
BLACE
BLCAP
BLID
BLM
BLMH
BLNK
BLOC1S1
BLOC1S2
BLOC1S3
BLOC1S4
BLOC1S5
BLOC1S5-TXNDC5
BLOC1S6
BLVRA
BLVRB
BLZF1
BMF
BMI1
BMP1
BMP2
BMP2K
BMP3
BMP4
BMP6
BMP7
BMP8A
BMP8B
BMPER
BMPR1A
BMPR1B
BMPR2
BMS1
BMS1P17
BMS1P18
BMS1P20
BMS1P21
BMS1P4
BMS1P5
BMS1P6
BNC1
BNC2
BNIP1
BNIP2
BNIP3
BNIP3L
BNIPL
BOC
BOD1
BOD1L1
BOK
BOLA1
BOLA2
BOLA2B
BOLA3
BOLA3-AS1
BOLL
BOP1
BORA
BPGM
BPHL
BPIFC
BPNT1
BPTF
BRAF
BRAP
BRAT1
BRCA1
BRCA2
BRCAT54
BRCC3
BRD1
BRD2
BRD3
BRD4
BRD7
BRD7P3
BRD8
BRD9
BRDT
BRE
BREA2
BRE-AS1
BRF1
BRF2
BRI3
BRI3BP
BRICD5
BRINP1
BRINP2
BRIP1
BRIX1
BRK1
BRMS1
BRMS1L
BROX
BRPF1
BRPF3
BRSK1
BRSK2
BRWD1
BRWD1-AS1
BRWD3
BSCL2
BSDC1
BSG
BSN
BSN-AS2
BSPRY
BST2
BTAF1
BTBD1
BTBD10
BTBD11
BTBD16
BTBD18
BTBD2
BTBD3
BTBD6
BTBD7
BTBD8
BTBD9
BTC
BTD
BTF3
BTF3L4
BTF3P11
BTG1
BTG2
BTG3
BTN2A1
BTN2A2
BTN2A3P
BTN3A1
BTN3A2
BTN3A3
BTNL9
BTRC
BUB1
BUB1B
BUB3
BUD13
BUD31
BVES
BYSL
BZRAP1
BZRAP1-AS1
BZW1
BZW2
C10orf10
C10orf11
C10orf111
C10orf113
C10orf12
C10orf126
C10orf128
C10orf131
C10orf2
C10orf25
C10orf32
C10orf32-ASMT
C10orf54
C10orf55
C10orf67
C10orf76
C10orf88
C10orf90
C10orf99
C11orf1
C11orf24
C11orf30
C11orf31
C11orf44
C11orf45
C11orf49
C11orf52
C11orf54
C11orf57
C11orf58
C11orf63
C11orf65
C11orf68
C11orf70
C11orf71
C11orf72
C11orf73
C11orf74
C11orf80
C11orf84
C11orf88
C11orf91
C11orf95
C11orf96
C11orf98
C12orf10
C12orf29
C12orf4
C12orf43
C12orf45
C12orf49
C12orf54
C12orf56
C12orf57
C12orf60
C12orf65
C12orf66
C12orf71
C12orf73
C12orf75
C12orf76
C12orf77
C12orf79
C12orf80
C14orf1
C14orf105
C14orf119
C14orf132
C14orf142
C14orf159
C14orf166
C14orf169
C14orf178
C14orf2
C14orf28
C14orf37
C14orf79
C14orf80
C14orf93
C15orf38-AP3S2
C15orf39
C15orf40
C15orf41
C15orf48
C15orf52
C15orf54
C15orf56
C15orf57
C15orf59
C15orf61
C15orf62
C15orf65
C16orf13
C16orf45
C16orf46
C16orf52
C16orf54
C16orf58
C16orf59
C16orf62
C16orf70
C16orf71
C16orf72
C16orf74
C16orf86
C16orf87
C16orf89
C16orf91
C16orf95
C17orf100
C17orf107
C17orf49
C17orf51
C17orf53
C17orf58
C17orf59
C17orf62
C17orf67
C17orf75
C17orf77
C17orf78
C17orf80
C17orf85
C17orf89
C17orf96
C17orf97
C17orf98
C17orf99
C18orf21
C18orf25
C18orf32
C18orf54
C18orf61
C18orf65
C18orf8
C19orf12
C19orf18
C19orf24
C19orf25
C19orf33
C19orf35
C19orf38
C19orf43
C19orf44
C19orf47
C19orf48
C19orf52
C19orf53
C19orf54
C19orf57
C19orf60
C19orf66
C19orf68
C19orf70
C19orf73
C1D
C1GALT1
C1GALT1C1
C1orf101
C1orf105
C1orf106
C1orf109
C1orf112
C1orf115
C1orf116
C1orf122
C1orf123
C1orf131
C1orf140
C1orf141
C1orf145
C1orf159
C1orf174
C1orf177
C1orf186
C1orf198
C1orf204
C1orf21
C1orf210
C1orf216
C1orf220
C1orf226
C1orf228
C1orf229
C1orf233
C1orf27
C1orf35
C1orf43
C1orf50
C1orf52
C1orf53
C1orf54
C1orf56
C1orf68
C1orf74
C1orf95
C1QBP
C1QL3
C1QTNF1
C1QTNF2
C1QTNF3
C1QTNF3-AMACR
C1QTNF5
C1QTNF6
C1QTNF7
C1QTNF9
C1QTNF9B-AS1
C1R
C1RL
C1RL-AS1
C1S
C2
C20orf166-AS1
C20orf194
C20orf196
C20orf197
C20orf203
C20orf24
C20orf27
C20orf96
C21orf2
C21orf33
C21orf58
C21orf59
C21orf62
C21orf62-AS1
C21orf91
C21orf91-OT1
C22orf23
C22orf29
C22orf34
C22orf39
C22orf46
C2-AS1
C2CD2
C2CD2L
C2CD3
C2CD4A
C2CD4B
C2CD4C
C2CD4D
C2CD5
C2orf15
C2orf27A
C2orf40
C2orf42
C2orf44
C2orf47
C2orf48
C2orf49
C2orf54
C2orf66
C2orf68
C2orf69
C2orf74
C2orf76
C2orf81
C2orf83
C2orf88
C2orf91
C3
C3orf14
C3orf17
C3orf18
C3orf33
C3orf35
C3orf38
C3orf49
C3orf52
C3orf58
C3orf62
C3orf67
C3orf70
C4orf19
C4orf26
C4orf27
C4orf29
C4orf3
C4orf32
C4orf33
C4orf46
C4orf47
C4orf48
C5
C5AR1
C5AR2
C5orf15
C5orf17
C5orf22
C5orf24
C5orf28
C5orf30
C5orf34
C5orf38
C5orf42
C5orf45
C5orf46
C5orf51
C5orf56
C5orf60
C5orf63
C5orf64
C5orf66
C6orf1
C6orf106
C6orf120
C6orf132
C6orf136
C6orf141
C6orf15
C6orf163
C6orf165
C6orf201
C6orf203
C6orf226
C6orf25
C6orf47
C6orf48
C6orf52
C6orf62
C6orf7
C6orf89
C6orf99
C7
C7orf13
C7orf25
C7orf26
C7orf31
C7orf43
C7orf49
C7orf50
C7orf55
C7orf55-LUC7L2
C7orf57
C7orf60
C7orf61
C7orf65
C7orf69
C7orf73
C8orf31
C8orf33
C8orf34-AS1
C8orf37
C8orf4
C8orf44
C8orf44-SGK3
C8orf46
C8orf48
C8orf49
C8orf58
C8orf59
C8orf76
C8orf82
C8orf86
C8orf88
C9
C9orf114
C9orf116
C9orf117
C9orf131
C9orf135-AS1
C9orf139
C9orf142
C9orf153
C9orf156
C9orf16
C9orf3
C9orf40
C9orf41-AS1
C9orf47
C9orf64
C9orf66
C9orf69
C9orf72
C9orf78
C9orf84
C9orf85
C9orf89
C9orf9
C9orf91
CA1
CA11
CA12
CA13
CA14
CA2
CA3
CA3-AS1
CA5B
CA6
CA9
CAAP1
CAB39
CAB39L
CABIN1
CABLES1
CABLES2
CABP1
CABP4
CABP5
CABYR
CACFD1
CACHD1
CACNA1A
CACNA1C
CACNA1C-AS2
CACNA1C-AS4
CACNA1G
CACNA2D1
CACNA2D2
CACNA2D3
CACNA2D4
CACNB1
CACNB2
CACNB3
CACNB4
CACNG2
CACNG8
CACTIN
CACUL1
CACYBP
CAD
CADM1
CADM2-AS2
CADM4
CADPS
CADPS2
CAGE1
CAHM
CALB2
CALCOCO1
CALCOCO2
CALCRL
CALD1
CALHM1
CALHM2
CALM1
CALM2
CALM3
CALML3
CALML3-AS1
CALML4
CALML5
CALN1
CALR
CALU
CAMK1
CAMK1D
CAMK1G
CAMK2B
CAMK2D
CAMK2G
CAMK2N1
CAMKK1
CAMKK2
CAMKMT
CAMLG
CAMSAP1
CAMSAP2
CAMSAP3
CAMTA1
CAMTA2
CAND1
CAND1.11
CAND2
CANT1
CANX
CAP1
[truncated: 15,562 more rows]

## Sheet: Overrep. Test-Mixed Community
Analysis Type:	PANTHER Overrepresentation Test (Released 20190711)
Annotation Version and Release Date:	GO Ontology database Released 2019-07-03
Analyzed List:	upload_1 (Homo sapiens)
Reference List:	Background Genelist with basemean over 1.txt (Homo sapiens)
Test Type:	FISHER
Correction:	FDR
GO biological process complete	Background Genelist with basemean over 1.txt - REFLIST (14857)	upload_1 (1458)	upload_1 (expected)	upload_1 (over/under)	upload_1 (fold Enrichment)	upload_1 (raw P-value)	upload_1 (FDR)
endodermal cell differentiation (GO:0035987)	33	12	3.24	+	3.71	0.000438	0.0328
cellular response to corticosteroid stimulus (GO:0071384)	48	16	4.71	+	3.4	0.000119	0.0128
cellular response to glucocorticoid stimulus (GO:0071385)	45	15	4.42	+	3.4	0.000193	0.0177
response to activity (GO:0014823)	56	18	5.5	+	3.28	6.75e-05	0.00842
ADP metabolic process (GO:0046031)	41	13	4.02	+	3.23	0.000749	0.0477
type I interferon signaling pathway (GO:0060337)	52	16	5.1	+	3.14	0.000255	0.022
cellular response to type I interferon (GO:0071357)	52	16	5.1	+	3.14	0.000255	0.0219
regulation of interferon-beta production (GO:0032648)	47	14	4.61	+	3.04	0.000795	0.05
regulation of interleukin-1 beta production (GO:0032651)	58	17	5.69	+	2.99	0.000267	0.0226
cellular response to decreased oxygen levels (GO:0036294)	176	51	17.27	+	2.95	4.96e-10	1.26e-06
cellular response to hypoxia (GO:0071456)	166	47	16.29	+	2.89	6.29e-09	6.83e-06
response to type I interferon (GO:0034340)	57	16	5.59	+	2.86	0.000597	0.0406
positive regulation of reactive oxygen species metabolic process (GO:2000379)	82	23	8.05	+	2.86	4.27e-05	0.00607
regulation of transcription from RNA polymerase II promoter in response to hypoxia (GO:0061418)	73	20	7.16	+	2.79	0.000172	0.0165
regulation of defense response to virus (GO:0050688)	70	19	6.87	+	2.77	0.000274	0.0228
response to decreased oxygen levels (GO:0036293)	303	82	29.74	+	2.76	6.53e-14	9.94e-10
ERBB signaling pathway (GO:0038127)	63	17	6.18	+	2.75	0.000596	0.0407
cellular response to oxygen levels (GO:0071453)	191	51	18.74	+	2.72	8.19e-09	8.31e-06
response to hypoxia (GO:0001666)	292	77	28.66	+	2.69	1.55e-12	7.85e-09
positive regulation of type I interferon production (GO:0032481)	74	19	7.26	+	2.62	0.000654	0.0435
response to oxygen levels (GO:0070482)	324	83	31.8	+	2.61	7.22e-13	5.49e-09
multicellular organism growth (GO:0035264)	76	19	7.46	+	2.55	0.000784	0.0495
ATP metabolic process (GO:0046034)	159	39	15.6	+	2.5	2.09e-06	0.000707
regulation of smooth muscle cell proliferation (GO:0048660)	120	28	11.78	+	2.38	0.000123	0.0129
positive regulation of angiogenesis (GO:0045766)	133	31	13.05	+	2.38	7.8e-05	0.00913
regulation of type I interferon production (GO:0032479)	121	28	11.87	+	2.36	0.000135	0.0136
regulation of lipid localization (GO:1905952)	106	24	10.4	+	2.31	0.000544	0.0383
defense response to virus (GO:0051607)	157	35	15.41	+	2.27	5.49e-05	0.00739
cellular response to steroid hormone stimulus (GO:0071383)	155	33	15.21	+	2.17	0.000153	0.0149
cellular modified amino acid metabolic process (GO:0006575)	160	34	15.7	+	2.17	0.000121	0.0128
positive regulation of vasculature development (GO:1904018)	152	32	14.92	+	2.15	0.000226	0.0202
regulation of angiogenesis (GO:0045765)	234	49	22.96	+	2.13	7.04e-06	0.0016
cellular response to acid chemical (GO:0071229)	178	37	17.47	+	2.12	9.5e-05	0.0106
positive regulation of peptidyl-tyrosine phosphorylation (GO:0050731)	150	31	14.72	+	2.11	0.000526	0.0378
aging (GO:0007568)	235	48	23.06	+	2.08	1.3e-05	0.00245
response to virus (GO:0009615)	232	47	22.77	+	2.06	2.75e-05	0.00419
regulation of G2/M transition of mitotic cell cycle (GO:0010389)	183	37	17.96	+	2.06	0.000179	0.0169
multi-multicellular organism process (GO:0044706)	166	33	16.29	+	2.03	0.000605	0.0407
angiogenesis (GO:0001525)	280	55	27.48	+	2	1.01e-05	0.00213
regulation of vasculature development (GO:1901342)	262	51	25.71	+	1.98	2.24e-05	0.0037
response to acid chemical (GO:0001101)	284	55	27.87	+	1.97	1.23e-05	0.00235
negative regulation of apoptotic signaling pathway (GO:2001234)	207	40	20.31	+	1.97	0.000265	0.0226
blood vessel morphogenesis (GO:0048514)	360	69	35.33	+	1.95	1.78e-06	0.000643
activation of innate immune response (GO:0002218)	206	39	20.22	+	1.93	0.000397	0.0307
regulation of cell cycle G2/M phase transition (GO:1902749)	198	37	19.43	+	1.9	0.000721	0.0463
cellular response to extracellular stimulus (GO:0031668)	231	43	22.67	+	1.9	0.000249	0.0218
positive regulation of innate immune response (GO:0045089)	274	51	26.89	+	1.9	7.15e-05	0.00877
response to steroid hormone (GO:0048545)	258	48	25.32	+	1.9	0.000107	0.0119
extracellular structure organization (GO:0043062)	307	57	30.13	+	1.89	2.53e-05	0.00396
response to oxidative stress (GO:0006979)	334	61	32.78	+	1.86	2.26e-05	0.0037
generation of precursor metabolites and energy (GO:0006091)	351	64	34.45	+	1.86	1.59e-05	0.00284
positive regulation of response to biotic stimulus (GO:0002833)	291	53	28.56	+	1.86	7.91e-05	0.00912
rhythmic process (GO:0048511)	226	41	22.18	+	1.85	0.000696	0.0456
innate immune response (GO:0045087)	471	85	46.22	+	1.84	7.28e-07	0.000299
extracellular matrix organization (GO:0030198)	278	50	27.28	+	1.83	0.000177	0.0168
response to antibiotic (GO:0046677)	245	44	24.04	+	1.83	0.00052	0.0375
blood vessel development (GO:0001568)	431	76	42.3	+	1.8	7.79e-06	0.00174
positive regulation of response to external stimulus (GO:0032103)	466	82	45.73	+	1.79	2.87e-06	0.00089
positive regulation of defense response (GO:0031349)	370	65	36.31	+	1.79	3.7e-05	0.00532
cellular response to external stimulus (GO:0071496)	296	52	29.05	+	1.79	0.000268	0.0225
defense response (GO:0006952)	868	152	85.18	+	1.78	1.51e-10	4.6e-07
regulation of response to biotic stimulus (GO:0002831)	431	75	42.3	+	1.77	1.15e-05	0.00224
regulation of innate immune response (GO:0045088)	368	64	36.11	+	1.77	5.2e-05	0.00713
positive regulation of secretion by cell (GO:1903532)	302	52	29.64	+	1.75	0.00032	0.0256
defense response to other organism (GO:0098542)	587	101	57.61	+	1.75	5.09e-07	0.000235
vasculature development (GO:0001944)	448	77	43.96	+	1.75	1.61e-05	0.00285
cellular response to lipid (GO:0071396)	431	74	42.3	+	1.75	2.28e-05	0.00369
positive regulation of cytokine production (GO:0001819)	362	62	35.53	+	1.75	0.000129	0.0131
cardiovascular system development (GO:0072358)	456	78	44.75	+	1.74	1.35e-05	0.00251
positive regulation of cell migration (GO:0030335)	433	74	42.49	+	1.74	2.4e-05	0.0038
cytokine-mediated signaling pathway (GO:0019221)	541	92	53.09	+	1.73	3.22e-06	0.00096
inflammatory response (GO:0006954)	357	60	35.03	+	1.71	0.000233	0.0206
regulation of mitotic cell cycle phase transition (GO:1901990)	393	66	38.57	+	1.71	0.000119	0.0129
positive regulation of cell motility (GO:2000147)	447	75	43.87	+	1.71	4.39e-05	0.00612
regulation of apoptotic signaling pathway (GO:2001233)	370	62	36.31	+	1.71	0.000212	0.0191
response to abiotic stimulus (GO:0009628)	971	162	95.29	+	1.7	8.21e-10	1.78e-06
positive regulation of secretion (GO:0051047)	324	54	31.8	+	1.7	0.000501	0.0366
reproductive system development (GO:0061458)	350	58	34.35	+	1.69	0.0004	0.0307
regulation of cell cycle phase transition (GO:1901987)	418	69	41.02	+	1.68	0.000134	0.0135
positive regulation of multi-organism process (GO:0043902)	420	69	41.22	+	1.67	0.00014	0.0139
reproductive structure development (GO:0048608)	347	57	34.05	+	1.67	0.000529	0.0378
regulation of cytokine production (GO:0001817)	568	93	55.74	+	1.67	1.01e-05	0.00211
positive regulation of cellular component movement (GO:0051272)	460	75	45.14	+	1.66	7.87e-05	0.00914
positive regulation of establishment of protein localization (GO:1904951)	377	61	37	+	1.65	0.000467	0.0348
activation of immune response (GO:0002253)	365	59	35.82	+	1.65	0.000706	0.0461
response to other organism (GO:0051707)	881	142	86.46	+	1.64	8.53e-08	5.9e-05
response to external biotic stimulus (GO:0043207)	881	142	86.46	+	1.64	8.53e-08	5.64e-05
cellular response to cytokine stimulus (GO:0071345)	827	133	81.16	+	1.64	2.42e-07	0.000132
positive regulation of locomotion (GO:0040017)	473	76	46.42	+	1.64	0.000128	0.0133
response to biotic stimulus (GO:0009607)	904	145	88.71	+	1.63	6.67e-08	4.83e-05
response to extracellular stimulus (GO:0009991)	431	69	42.3	+	1.63	0.000311	0.0251
negative regulation of apoptotic process (GO:0043066)	734	117	72.03	+	1.62	2.37e-06	0.000783
regulation of hemopoiesis (GO:1903706)	383	61	37.59	+	1.62	0.000694	0.0457
regulation of multi-organism process (GO:0043900)	639	101	62.71	+	1.61	1.62e-05	0.00283
circulatory system development (GO:0072359)	735	115	72.13	+	1.59	5.82e-06	0.00145
negative regulation of programmed cell death (GO:0043069)	748	117	73.41	+	1.59	5.17e-06	0.00133
response to organic cyclic compound (GO:0014070)	698	109	68.5	+	1.59	1.13e-05	0.00223
regulation of defense response (GO:0031347)	603	94	59.18	+	1.59	5.67e-05	0.0075
response to cytokine (GO:0034097)	907	141	89.01	+	1.58	5.55e-07	0.000241
positive regulation of immune system process (GO:0002684)	768	119	75.37	+	1.58	5.19e-06	0.00132
response to lipid (GO:0033993)	673	104	66.05	+	1.57	2.57e-05	0.00399
oxidation-reduction process (GO:0055114)	802	123	78.7	+	1.56	5.89e-06	0.00145
tube morphogenesis (GO:0035239)	570	87	55.94	+	1.56	0.0002	0.0183
response to hormone (GO:0009725)	695	106	68.2	+	1.55	3.39e-05	0.00506
regulation of mitotic cell cycle (GO:0007346)	586	89	57.51	+	1.55	0.000185	0.0173
regulation of apoptotic process (GO:0042981)	1293	196	126.89	+	1.54	1.23e-08	1.17e-05
regulation of cell adhesion (GO:0030155)	561	85	55.05	+	1.54	0.00031	0.0252
regulation of programmed cell death (GO:0043067)	1311	197	128.66	+	1.53	2e-08	1.6e-05
regulation of anatomical structure morphogenesis (GO:0022603)	879	132	86.26	+	1.53	6.43e-06	0.0015
negative regulation of cell death (GO:0060548)	820	123	80.47	+	1.53	1.62e-05	0.0028
positive regulation of immune response (GO:0050778)	540	81	52.99	+	1.53	0.000543	0.0385
cellular response to oxygen-containing compound (GO:1901701)	832	124	81.65	+	1.52	1.85e-05	0.0031
head development (GO:0060322)	611	91	59.96	+	1.52	0.000317	0.0256
regulation of response to external stimulus (GO:0032101)	848	126	83.22	+	1.51	1.71e-05	0.00292
positive regulation of cell population proliferation (GO:0008284)	715	106	70.17	+	1.51	9.43e-05	0.0106
central nervous system development (GO:0007417)	750	111	73.6	+	1.51	7.97e-05	0.00912
tube development (GO:0035295)	721	106	70.76	+	1.5	0.000129	0.0132
brain development (GO:0007420)	572	84	56.13	+	1.5	0.000761	0.0482
response to external stimulus (GO:0009605)	1725	253	169.28	+	1.49	9.35e-10	1.78e-06
regulation of cell motility (GO:2000145)	768	112	75.37	+	1.49	0.000122	0.0129
regulation of cell migration (GO:0030334)	720	105	70.66	+	1.49	0.000207	0.0188
immune effector process (GO:0002252)	770	112	75.56	+	1.48	0.000125	0.013
positive regulation of cell death (GO:0010942)	619	90	60.75	+	1.48	0.000582	0.0402
regulation of cell death (GO:0010941)	1404	204	137.78	+	1.48	1.09e-07	6.93e-05
negative regulation of cell communication (GO:0010648)	1144	166	112.27	+	1.48	2.44e-06	0.000791
negative regulation of signaling (GO:0023057)	1147	166	112.56	+	1.47	3.18e-06	0.000967
cell migration (GO:0016477)	688	99	67.52	+	1.47	0.000517	0.0375
regulation of immune system process (GO:0002682)	1169	168	114.72	+	1.46	3.84e-06	0.00108
regulation of immune response (GO:0050776)	752	108	73.8	+	1.46	0.000276	0.0227
negative regulation of signal transduction (GO:0009968)	1073	154	105.3	+	1.46	1.15e-05	0.00221
multi-organism reproductive process (GO:0044703)	704	101	69.09	+	1.46	0.000469	0.0348
regulation of cell cycle process (GO:0010564)	700	100	68.69	+	1.46	0.000573	0.0398
positive regulation of multicellular organismal process (GO:0051240)	1386	198	136.02	+	1.46	6.45e-07	0.000272
regulation of cellular component movement (GO:0051270)	834	119	81.85	+	1.45	0.000171	0.0165
localization of cell (GO:0051674)	760	108	74.58	+	1.45	0.000375	0.0294
cell motility (GO:0048870)	760	108	74.58	+	1.45	0.000375	0.0292
regulation of locomotion (GO:0040012)	828	117	81.26	+	1.44	0.000259	0.0221
anatomical structure formation involved in morphogenesis (GO:0048646)	730	103	71.64	+	1.44	0.00073	0.0467
carboxylic acid metabolic process (GO:0019752)	738	104	72.42	+	1.44	0.000625	0.0419
cellular response to organic substance (GO:0071310)	1874	264	183.91	+	1.44	1.41e-08	1.26e-05
regulation of cell population proliferation (GO:0042127)	1294	182	126.99	+	1.43	4.15e-06	0.00113
regulation of cellular catabolic process (GO:0031329)	755	106	74.09	+	1.43	0.000707	0.0459
reproductive process (GO:0022414)	1042	146	102.26	+	1.43	5.68e-05	0.00745
reproduction (GO:0000003)	1043	146	102.36	+	1.43	5.74e-05	0.00747
multi-organism process (GO:0051704)	2062	288	202.36	+	1.42	5.12e-09	6e-06
response to nitrogen compound (GO:1901698)	845	118	82.92	+	1.42	0.000368	0.029
response to oxygen-containing compound (GO:1901700)	1219	170	119.63	+	1.42	1.45e-05	0.00265
immune response (GO:0006955)	1157	160	113.54	+	1.41	4.29e-05	0.00605
negative regulation of protein metabolic process (GO:0051248)	941	130	92.35	+	1.41	0.000249	0.0219
regulation of response to stress (GO:0080134)	1256	173	123.26	+	1.4	2.31e-05	0.0037
cellular response to chemical stimulus (GO:0070887)	2282	314	223.95	+	1.4	3.44e-09	4.37e-06
response to organic substance (GO:0010033)	2355	324	231.11	+	1.4	1.74e-09	2.41e-06
negative regulation of response to stimulus (GO:0048585)	1367	188	134.15	+	1.4	1.06e-05	0.00213
cell cycle process (GO:0022402)	889	122	87.24	+	1.4	0.000506	0.0368
response to endogenous stimulus (GO:0009719)	1136	155	111.48	+	1.39	0.000108	0.0119
regulation of multicellular organismal process (GO:0051239)	2481	338	243.47	+	1.39	1.53e-09	2.33e-06
response to stress (GO:0006950)	2776	378	272.42	+	1.39	1.12e-10	4.27e-07
positive regulation of biosynthetic process (GO:0009891)	1675	228	164.38	+	1.39	1.95e-06	0.000691
locomotion (GO:0040011)	942	128	92.44	+	1.38	0.00057	0.0399
regulation of multicellular organismal development (GO:2000026)	1648	223	161.73	+	1.38	3.83e-06	0.0011
positive regulation of cellular biosynthetic process (GO:0031328)	1649	223	161.83	+	1.38	3.86e-06	0.00107
regulation of cell differentiation (GO:0045595)	1465	198	143.77	+	1.38	1.57e-05	0.00285
positive regulation of transcription by RNA polymerase II (GO:0045944)	980	132	96.17	+	1.37	0.000591	0.0405
positive regulation of protein modification process (GO:0031401)	1010	136	99.12	+	1.37	0.00057	0.0398
phosphorylation (GO:0016310)	1107	149	108.64	+	1.37	0.000252	0.0219
positive regulation of macromolecule biosynthetic process (GO:0010557)	1583	213	155.35	+	1.37	9.07e-06	0.00194
immune system process (GO:0002376)	1925	257	188.91	+	1.36	1.51e-06	0.00059
positive regulation of developmental process (GO:0051094)	1102	147	108.15	+	1.36	0.000436	0.0328
positive regulation of cellular protein metabolic process (GO:0032270)	1342	179	131.7	+	1.36	8.67e-05	0.00984
regulation of developmental process (GO:0050793)	2078	277	203.93	+	1.36	5.43e-07	0.000243
regulation of cell cycle (GO:0051726)	1091	145	107.07	+	1.35	0.000602	0.0407
positive regulation of nucleobase-containing compound metabolic process (GO:0045935)	1575	208	154.56	+	1.35	3.45e-05	0.00499
cellular response to stress (GO:0033554)	1549	203	152.01	+	1.34	6.49e-05	0.00822
regulation of cellular protein metabolic process (GO:0032268)	2197	287	215.6	+	1.33	1.43e-06	0.000572
positive regulation of protein metabolic process (GO:0051247)	1425	186	139.84	+	1.33	0.000189	0.0175
positive regulation of transcription, DNA-templated (GO:0045893)	1279	166	125.52	+	1.32	0.000591	0.0407
positive regulation of nucleic acid-templated transcription (GO:1903508)	1359	176	133.37	+	1.32	0.000413	0.0316
positive regulation of RNA biosynthetic process (GO:1902680)	1360	176	133.46	+	1.32	0.000416	0.0317
positive regulation of RNA metabolic process (GO:0051254)	1438	186	141.12	+	1.32	0.000286	0.0234
cell surface receptor signaling pathway (GO:0007166)	1773	229	173.99	+	1.32	4.83e-05	0.00668
positive regulation of nitrogen compound metabolic process (GO:0051173)	2633	339	258.39	+	1.31	4.22e-07	0.0002
response to chemical (GO:0042221)	3149	405	309.03	+	1.31	1.49e-08	1.26e-05
positive regulation of metabolic process (GO:0009893)	2994	385	293.82	+	1.31	4.66e-08	3.55e-05
positive regulation of gene expression (GO:0010628)	1649	212	161.83	+	1.31	0.000141	0.0139
positive regulation of macromolecule metabolic process (GO:0010604)	2777	357	272.52	+	1.31	1.98e-07	0.000116
positive regulation of cellular metabolic process (GO:0031325)	2754	354	270.27	+	1.31	2.2e-07	0.000124
regulation of protein metabolic process (GO:0051246)	2332	298	228.85	+	1.3	5.09e-06	0.00134
positive regulation of response to stimulus (GO:0048584)	1841	235	180.67	+	1.3	7.53e-05	0.00895
regulation of phosphorus metabolic process (GO:0051174)	1483	189	145.54	+	1.3	0.000487	0.0358
regulation of phosphate metabolic process (GO:0019220)	1481	188	145.34	+	1.29	0.000669	0.0443
regulation of intracellular signal transduction (GO:1902531)	1563	198	153.39	+	1.29	0.000469	0.0347
animal organ development (GO:0048513)	2403	304	235.82	+	1.29	7.87e-06	0.00174
regulation of cellular component organization (GO:0051128)	2128	267	208.83	+	1.28	6.36e-05	0.00819
nervous system development (GO:0007399)	1861	232	182.63	+	1.27	0.00035	0.0277
negative regulation of nitrogen compound metabolic process (GO:0051172)	1979	246	194.21	+	1.27	0.000231	0.0206
regulation of signal transduction (GO:0009966)	2587	320	253.88	+	1.26	2.65e-05	0.00407
negative regulation of cellular metabolic process (GO:0031324)	2148	264	210.8	+	1.25	0.000274	0.0229
positive regulation of biological process (GO:0048518)	4878	595	478.71	+	1.24	1.39e-09	2.35e-06
regulation of response to stimulus (GO:0048583)	3345	408	328.26	+	1.24	3.55e-06	0.00104
negative regulation of cellular process (GO:0048523)	3865	471	379.29	+	1.24	3.39e-07	0.000172
system development (GO:0048731)	3401	412	333.76	+	1.23	6.38e-06	0.00152
cell differentiation (GO:0030154)	2775	336	272.33	+	1.23	7.75e-05	0.00914
negative regulation of metabolic process (GO:0009892)	2447	296	240.14	+	1.23	0.000276	0.0228
regulation of localization (GO:0032879)	2191	265	215.02	+	1.23	0.00063	0.042
positive regulation of cellular process (GO:0048522)	4371	528	428.95	+	1.23	1.12e-07	6.79e-05
cellular developmental process (GO:0048869)	2859	345	280.57	+	1.23	7.02e-05	0.00868
negative regulation of macromolecule metabolic process (GO:0010605)	2244	270	220.22	+	1.23	0.000713	0.046
regulation of cell communication (GO:0010646)	2865	344	281.16	+	1.22	0.000109	0.0119
negative regulation of biological process (GO:0048519)	4337	520	425.61	+	1.22	3.81e-07	0.000187
regulation of signaling (GO:0023051)	2897	346	284.3	+	1.22	0.000153	0.0148
multicellular organism development (GO:0007275)	3848	459	377.63	+	1.22	6.2e-06	0.0015
cellular nitrogen compound metabolic process (GO:0034641)	3021	360	296.47	+	1.21	0.000128	0.0132
regulation of biological quality (GO:0065008)	3164	377	310.5	+	1.21	7.37e-05	0.0089
biosynthetic process (GO:0009058)	2561	305	251.33	+	1.21	0.000533	0.0379
developmental process (GO:0032502)	4408	520	432.58	+	1.2	2.65e-06	0.00084
anatomical structure development (GO:0048856)	4129	487	405.2	+	1.2	8.47e-06	0.00184
multicellular organismal process (GO:0032501)	4849	567	475.86	+	1.19	1.73e-06	0.000641
signal transduction (GO:0007165)	3421	400	335.72	+	1.19	0.000192	0.0177
cell communication (GO:0007154)	3738	433	366.83	+	1.18	0.000181	0.017
regulation of biosynthetic process (GO:0009889)	3577	413	351.03	+	1.18	0.000391	0.0303
signaling (GO:0023052)	3647	420	357.9	+	1.17	0.000426	0.0322
regulation of gene expression (GO:0010468)	3762	433	369.19	+	1.17	0.000341	0.0271
cellular component organization (GO:0016043)	4705	540	461.73	+	1.17	3.4e-05	0.00501
regulation of nitrogen compound metabolic process (GO:0051171)	4842	554	475.17	+	1.17	3.41e-05	0.00499
cellular component organization or biogenesis (GO:0071840)	4888	559	479.69	+	1.17	3.14e-05	0.00472
response to stimulus (GO:0050896)	5981	682	586.95	+	1.16	1.54e-06	0.000587
regulation of metabolic process (GO:0019222)	5552	633	544.85	+	1.16	6.77e-06	0.00156
regulation of primary metabolic process (GO:0080090)	4995	567	490.19	+	1.16	6.39e-05	0.00816
cellular response to stimulus (GO:0051716)	4777	542	468.79	+	1.16	0.000111	0.012
regulation of macromolecule metabolic process (GO:0060255)	5118	580	502.26	+	1.15	5.52e-05	0.00736
regulation of cellular metabolic process (GO:0031323)	5167	584	507.07	+	1.15	6.49e-05	0.00816
cellular metabolic process (GO:0044237)	6529	736	640.73	+	1.15	2e-06	0.00069
localization (GO:0051179)	4539	509	445.44	+	1.14	0.000709	0.0459
nitrogen compound metabolic process (GO:0006807)	5956	663	584.5	+	1.13	7.17e-05	0.00873
metabolic process (GO:0008152)	7048	773	691.66	+	1.12	5.33e-05	0.00724
organic substance metabolic process (GO:0071704)	6612	725	648.87	+	1.12	0.00014	0.0138
regulation of cellular process (GO:0050794)	8271	897	811.68	+	1.11	1.78e-05	0.00301
regulation of biological process (GO:0050789)	8800	953	863.59	+	1.1	4.97e-06	0.00133
biological regulation (GO:0065007)	9333	992	915.9	+	1.08	7.51e-05	0.00899
cellular process (GO:0009987)	11044	1171	1083.81	+	1.08	3.37e-07	0.000177
biological_process (GO:0008150)	13256	1353	1300.88	+	1.04	1.06e-05	0.00214
Unclassified (UNCLASSIFIED)	1601	105	157.12	-	0.67	1.06e-05	0.00217

## Sheet: Overrep. Test-Mixed Not Monocul
Analysis Type:	PANTHER Overrepresentation Test (Released 20190711)
Annotation Version and Release Date:	GO Ontology database Released 2019-07-03
Analyzed List:	Client Text Box Input (Homo sapiens)
Reference List:	Background Genelist with basemean over 1.txt (Homo sapiens)
Test Type:	FISHER
Correction:	FDR
GO biological process complete	Background Genelist with basemean over 1.txt - REFLIST (14857)	Client Text Box Input (722)	Client Text Box Input (expected)	Client Text Box Input (over/under)	Client Text Box Input (fold Enrichment)	Client Text Box Input (raw P-value)	Client Text Box Input (FDR)
regulation of intrinsic apoptotic signaling pathway (GO:2001242)	151	21	7.34	+	2.86	4.77e-05	0.0484
chromosome organization (GO:0051276)	921	77	44.76	+	1.72	1.1e-05	0.0209
gene expression (GO:0010467)	1825	128	88.69	+	1.44	4.09e-05	0.0479
multi-organism process (GO:0051704)	2062	141	100.21	+	1.41	4.88e-05	0.0464
cellular nitrogen compound metabolic process (GO:0034641)	3021	205	146.81	+	1.4	5.61e-07	0.00284
heterocycle metabolic process (GO:0046483)	2617	173	127.18	+	1.36	2.83e-05	0.0479
nucleobase-containing compound metabolic process (GO:0006139)	2482	164	120.62	+	1.36	4.76e-05	0.0517
cellular aromatic compound metabolic process (GO:0006725)	2631	173	127.86	+	1.35	3.67e-05	0.0508
response to stress (GO:0006950)	2776	181	134.9	+	1.34	3.48e-05	0.053
nitrogen compound metabolic process (GO:0006807)	5956	359	289.44	+	1.24	3.46e-07	0.00263
cellular metabolic process (GO:0044237)	6529	391	317.29	+	1.23	8.99e-08	0.00137
macromolecule metabolic process (GO:0043170)	5281	316	256.64	+	1.23	9.98e-06	0.0217
organic substance metabolic process (GO:0071704)	6612	387	321.32	+	1.2	1.93e-06	0.00734
primary metabolic process (GO:0044238)	6342	369	308.2	+	1.2	9.32e-06	0.0236
metabolic process (GO:0008152)	7048	408	342.51	+	1.19	2.13e-06	0.00649
cellular process (GO:0009987)	11044	585	536.7	+	1.09	3.72e-05	0.0472
