# Supplementary material for: A mixed community of skin microbiome representatives influences cutaneous processes more than individual members
Source: Microbiome. 2021 Jan 22;9:22. doi: 10.1186/s40168-020-00963-1 (PMC7825201; doi:10.1186/s40168-020-00963-1)
Supplement: Supplementary file 7 — Additional file 6. Antimicrobial Peptide Gene Expression. This file contains differential gene expression data (Log2 fold change and the adjusted p-value) for genes that encode for antimicrobial proteins and peptides. Citations for the individual genes are also includes. (XLSX 250 kb) [file 40168_2020_963_MOESM7_ESM.xlsx]

## Sheet: Antimicrobial Peptide Genes
Genes Encoding for Antimicrobial Peptides
Adjusted p-value is less than 0.05
Log2 Fold Change is greater than 1.5
N.D indicates basemean <12.5
		Log2 Fold Change									Adjusted P-value
Gene/Product Name	Gene Symbol	Acinetobacter lwoffi	Bacillus sp.	Corynebacterium sp.	Micrococcus luteus	Paenibacillus sp.	Roseomonas mucosa	Staphylococcus epidermidis	Streptococcus luteciae	Mixed Community	Acinetobacter lwoffi	Bacillus sp.	Corynebacterium sp.	Micrococcus luteus	Paenibacillus sp.	Roseomonas mucosa	Staphylococcus epidermidis	Streptococcus luteciae	Mixed Community	Citation (details at bottom of Table)
Beta-defensin 1	DEFB1	-0.17	-0.28	-0.13	-0.11	-0.04	-0.04	-0.17	0.04	0.09	0.781744	0.488487	0.778285	0.827596	0.938516	0.992232	0.816969	1	0.860246	2
Beta-defensin 103	DEFB103A	-0.23	0.02	-0.22	-0.3	-0.08	-0.14	-0.06	-0.16	-0.16	0.63248	0.961285	0.551367	0.369937	0.865948	0.974982	0.936184	1	0.683161	1,2
Beta-defensin 104	DEFB103B	-0.23	0.02	-0.22	-0.3	-0.08	-0.14	-0.06	-0.16	-0.16	0.63248	0.961285	0.551367	0.369937	0.865948	0.974982	0.936184	1	0.683161	1,2
Beta-defensin 4A	DEFB4A	0.03	0.47	0.17	0.48	0.64	-0.08	0.04	0.03	0.25	0.958494	0.0935497	0.620966	0.0639294	0.0155375	0.985423	0.952949	1	0.371087	1,2
Beta-defensin 4B	DEFB4B	-0.02	-0.01	-0.01	-0.01	0.13	-0.02	0.03	-0.01	0.07	0.946788	0.963749	0.941147	0.965451	0.294037	0.991153	0.907893	1	0.580318	1,2
Neutrophil gelatinase-associated lipocalin	LCN2	-0.03	0.57	0	0.14	0.25	0.09	-0.07	0.07	0.09	0.962491	0.0429803	0.998591	0.703534	0.459377	0.984551	0.918283	1	0.831238	2
Galectin-8	LGALS8	-0.07	-0.21	-0.27	-0.04	-0.24	-0.08	-0.15	-0.17	0.03	0.82045	0.250306	0.124263	0.86785	0.193183	0.973926	0.628036	1	0.909222	2,5
Lysozyme C	LYZ	-0.32	-0.01	0.04	-0.28	-0.1	-0.57	0.25	-0.32	-0.11	0.545419	0.989093	0.935655	0.491395	0.859274	0.448292	0.70207	1	0.823494	2
N-acetylmuramoyl-L-alanine amidase	PGLYRP2	0.17	1.51	0.24	1.7	0.65	0.26	0.52	0.44	1.61	0.780528	5.73731e-06	0.592396	1.0916e-08	0.0764816	0.928039	0.0342735	1	3.47326e-08	2
Peptidoglycan recognition protein 4	PGLYRP4	-0.36	-0.06	-0.16	-0.02	0.11	-0.04	0.1	0.03	0.25	0.3471	0.888327	0.648119	0.962247	0.791913	0.992232	0.869584	1	0.436211	2
Ribonuclease 7	RNASE7	-0.19	-0.03	-0.28	-0.19	-0.2	0.14	-0.11	-0.1	0.07	0.629964	0.942803	0.319893	0.518059	0.518302	0.961124	0.823444	1	0.843526	2
Protein S100-A7A	S100A7A	0.37	0.14	0.09	0.39	0.74	0.31	0.38	0.37	0.16	0.466612	0.772549	0.862493	0.326134	0.041519	0.876071	0.496754	1	0.742286	2
Protein S100-A8	S100A8	-0.23	-0.1	-0.19	-0.29	0.04	-0.02	0.1	0.08	-0.11	0.580755	0.773798	0.556864	0.327028	0.932542	0.995346	0.855651	1	0.775176	2
Protein S100-A9	S100A9	-0.01	0	0.02	-0.38	-0.04	0.17	-0.09	0.09	-0.19	0.991909	0.997416	0.959743	0.147707	0.931751	0.949968	0.875732	1	0.548406	2
Adrenomedullin	ADM	0.24	0.22	0.36	0.84	0.59	-0.24	0.24	-0.59	0.86	0.621211	0.563179	0.308877	0.00332602	0.0667831	0.912774	0.682754	1	0.00263825	7
Peptidase Inhibitor 3	PI3	-0.11	0.16	-0.24	-0.15	-0.06	-0.02	-0.3	-0.19	-0.41	0.8135	0.599761	0.397025	0.619449	0.872019	0.995346	0.412944	1	0.101529	7
Dermcidin	DCD	N.D	N.D	N.D	N.D	N.D	N.D	N.D	N.D	N.D	N.D	N.D	N.D	N.D	N.D	N.D	N.D	N.D	N.D	2-4
Phospholipase A2, membrane associated	PLA2G2A	N.D	N.D	N.D	N.D	N.D	N.D	N.D	N.D	N.D	N.D	N.D	N.D	N.D	N.D	N.D	N.D	N.D	N.D	6
Galectin-4	LGALS4	N.D	N.D	N.D	N.D	N.D	N.D	N.D	N.D	N.D	N.D	N.D	N.D	N.D	N.D	N.D	N.D	N.D	N.D	2,5
Cathelicidin antimicrobial peptide	CAMP	N.D	N.D	N.D	N.D	N.D	N.D	N.D	N.D	N.D	N.D	N.D	N.D	N.D	N.D	N.D	N.D	N.D	N.D	2
Peptidoglycan recognition protein 3	PGLYRP3	N.D	N.D	N.D	N.D	N.D	N.D	N.D	N.D	N.D	N.D	N.D	N.D	N.D	N.D	N.D	N.D	N.D	N.D	2
Neutrophil defensin 1	DEFA1	N.D	N.D	N.D	N.D	N.D	N.D	N.D	N.D	N.D	N.D	N.D	N.D	N.D	N.D	N.D	N.D	N.D	N.D	1
Neutrophil defensin 4	DEFA4	N.D	N.D	N.D	N.D	N.D	N.D	N.D	N.D	N.D	N.D	N.D	N.D	N.D	N.D	N.D	N.D	N.D	N.D	1
Defensin-5	DEFA5	N.D	N.D	N.D	N.D	N.D	N.D	N.D	N.D	N.D	N.D	N.D	N.D	N.D	N.D	N.D	N.D	N.D	N.D	1,2
Defensin-6	DEFA6	N.D	N.D	N.D	N.D	N.D	N.D	N.D	N.D	N.D	N.D	N.D	N.D	N.D	N.D	N.D	N.D	N.D	N.D	1,2
Peptidoglycan recognition protein 1	PGLYRP1	N.D	N.D	N.D	N.D	N.D	N.D	N.D	N.D	N.D	N.D	N.D	N.D	N.D	N.D	N.D	N.D	N.D	N.D	2
References:
(1)	Lei, J.; Sun, L.; Huang, S.; Zhu, C.; Li, P.; He, J.; Mackey, V.; Coy, D. H.; He, Q. The Antimicrobial Peptides and Their Potential Clinical Applications. Am J Transl Res 2019, 11 (7), 3919–3931.
(2)	Gallo, R. L.; Hooper, L. V. Epithelial Antimicrobial Defence of the Skin and Intestine. Nat. Rev. Immunol. 2012, 12 (7), 503–516. https://doi.org/10.1038/nri3228.
(3)	Schittek, B.; Hipfel, R.; Sauer, B.; Bauer, J.; Kalbacher, H.; Stevanovic, S.; Schirle, M.; Schroeder, K.; Blin, N.; Meier, F.; Rassner, G.; Garbe, C. Dermcidin: A Novel Human Antibiotic Peptide Secreted by Sweat Glands. Nat. Immunol. 2001, 2 (12), 1133–1137. https://doi.org/10.1038/ni732.
(4)	Burian, M.; Schittek, B. The Secrets of Dermcidin Action. Int. J. Med. Microbiol. 2015, 305 (2), 283–286. https://doi.org/10.1016/j.ijmm.2014.12.012.
(5)	Stowell, S. R.; Arthur, C. M.; Dias-Baruffi, M.; Rodrigues, L. C.; Gourdine, J.-P.; Heimburg-Molinaro, J.; Ju, T.; Molinaro, R. J.; Rivera-Marrero, C.; Xia, B.; Smith, D. F.; Cummings, R. D. Innate Immune Lectins Kill Bacteria Expressing Blood Group Antigen. Nat Med 2010, 16 (3), 295–301. https://doi.org/10.1038/nm.2103.
(6)	Okita, Y.; Shiono, T.; Yahagi, A.; Hamada, S.; Umemura, M.; Matsuzaki, G. Interleukin-22-Induced Antimicrobial Phospholipase A2 Group IIA Mediates Protective Innate Immunity of Nonhematopoietic Cells against Listeria Monocytogenes. Infect Immun 2016, 84 (2), 573–579. https://doi.org/10.1128/IAI.01000-15.
(7)	Otto, M. Staphylococcus colonization of the skin and antimicrobial peptides. Expert Rev Dermatol. 2010, 5(2), 183-195.https://dpo.org/10.1586/edm.10.6
